# Supplementary material
Source: Research Square preprint supplement (doi:10.21203/rs.3.rs-8867198/v1)
Supplement: Supplementary file 1 [file 51e004be57cc5e0ea9f3e671.docx]

**Pilot analysis results:**

33 participant was included in the pilot study. Majority of them were males (60.6%). The mean of age was 28.18±3.75 years old. All of them were doctors with most of them (75.8%) working in public hospital. Majority of the sample were full time doctors (63.6%) with only 12 (36.4%) working as part time doctor. More than two thirds of the doctors were general practitioner (72.7%), with only 1 specialist in the sample. The mean number of working years was 2.93±3.27 years. Most of the participants are either currently in River Nile state (36.4%) or outside Sudan (33.3%) (**Table 1**).

39 variables have been used in the pilot analysis which were collected from previous study. Firstly, correlation matrix was performed within the variables. 1 variable have been eliminated due to significant correlation with coefficient above 0.8 and based on authors opinion: “When transferring patients from one unit to another, important information is often left out”. Then exploratory factor analysis was performed on the remaining 38 variables on multiple steps which finally yielded 4 components with eigenvalue of 1.928 (cumulative variance of 57.48%) and 22 variables. During the factor analysis variables with no loading, loading less than 0.4, cross loading has been eliminated one by one (**Table 2**). Then reliability testing was done for all 4 individual components. The Cronbach alpha for factor 1 to factor 4 were as following: 0.845,0.757,0.638 and 0.700 respectively. Factor 1 included 10 variables and it was named to be “Collaboration” (**Table 3**). Factor 2 included 5 variables and it was named to be “Training and Resources” (**Table 4**). Factor 3 included 3 variables and it was named to be “Staff communication”, but only 2 variables showed good reliability in the scale (**Table 5**). Factor 4 included 3 variables and it was named to be “Accountability” (**Table 6**). The reliability of the total scale that contain all 20 variables were 0.818.

**Table 1:** The table shows socio-demographic characteristics of the participants (**N=33**)

| **Variables** | | **Frequency** | **Column N %** |
| --- | --- | --- | --- |
| Age | | 28.18 | 3.75 |
| Did you work as a doctor for at least two months during the last year before the war in Sudan? | No | 5 | 15.2% |
| Yes | 28 | 84.8% |
| Did you work in Sudan for at least two months after the beginning of the war? | Yes | 33 | 100.0% |
| Gender | Female | 13 | 39.4% |
| Male | 20 | 60.6% |
| Marital status | Married | 5 | 15.2% |
| Single | 28 | 84.8% |
| Current Residency | Blue Nile state | 2 | 6.1% |
| Khartoum State | 3 | 9.1% |
| North state | 1 | 3.0% |
| Outside Sudan | 11 | 33.3% |
| Red Sea state | 1 | 3.0% |
| River Nile state | 12 | 36.4% |
| Sennar State | 1 | 3.0% |
| White nile state | 2 | 6.1% |
| What type of doctor are you? | Full-time doctor | 21 | 63.6% |
| Part-time doctor(not officially registered in the hospital / medical center ) | 12 | 36.4% |
| What is your current position? | General practitioner | 24 | 72.7% |
| Intern doctor | 8 | 24.2% |
| Specialist | 1 | 3.0% |
| What is your specialty? | General practitioner | 7 | 21.2% |
| Internal medicine | 9 | 27.3% |
| NICU medical officer | 1 | 3.0% |
| Not specialist | 5 | 15.0% |
| Ophthalmology | 1 | 3.0% |
| Pediatric | 4 | 12.1% |
| Psychiatry | 1 | 3.0% |
| Surgery | 5 | 15.1% |
| In your staff position do you typically have direct interaction with the patients? | YES, I typically have direct interaction or contact with patients | 33 | 100.0% |
| No | 0 | 0% |
| Which type of health facility are you currently working in? | Private hospital | 2 | 6.1 |
| Private medical center | 2 | 6.1 |
| Public hospital | 25 | 75.8 |
| Public medical center | 4 | 12.1 |
| How many patients due to see per day | | 29 | 26.7 |
| How many years you have been working as doctor | | 2 | 3.3 |

**Table 2:** The table shows factor analysis of the variables

| **Rotated Component Matrixa** | | | | |
| --- | --- | --- | --- | --- |
| **Variables** | **Component** | | | |
| **1** | **2** | **3** | **4** |
| In this unit, we have enough staff to handle the workload. | .344 | .714 |  |  |
| This unit relies too much on temporary, float, or PRN staff. (negatively worded) |  |  |  | .658 |
| This unit regularly reviews work processes to determine if changes are needed to improve patient safety. | .716 |  |  |  |
| This unit lets the same patient safety problems keep happening. (negatively worded) |  |  | .594 |  |
| In this unit, staff feel like their mistakes are held against them. |  |  |  | .757 |
| When an event is reported in this unit, it feels like the person is being written up, not the problem. |  |  |  | .895 |
| My supervisor, manager, or clinical leader seriously considers staff suggestions for improving patient safety | .748 |  |  |  |
| My supervisor, manager, or clinical leader wants us to work faster during busy times, even if it means taking shortcuts. | -.343 |  |  |  |
| My supervisor, manager, or clinical leader takes action to address patient safety concerns that are brought to their attention. | .816 |  |  |  |
| We are informed about errors that happen in this unit. | .758 |  |  |  |
| When errors happen in this unit, we discuss ways to prevent them from happening again. | .785 |  |  |  |
| In this unit, we are informed about changes that are made based on event reports. | .725 |  | .308 |  |
| When staff in this unit see someone with more authority doing something unsafe for patients, they speak up. | .623 |  |  |  |
| When staff in this unit speak up, those with more authority are open to their patient safety concerns. | .837 |  |  |  |
| When a mistake reaches the patient and could have harmed the patient, but did not, how often is this reported? |  | .401 | -.330 |  |
| Hospital management seems interested in patient safety only after an adverse event happens. | -.471 |  | .350 |  |
| During shift changes, important patient care information is often left out. |  |  | -.742 |  |
| During shift changes, there is adequate time to exchange all key patient care information. |  |  | .825 |  |
| How would you rate your unit/work area on patient safety | .591 |  |  |  |
| To what extent you agree that healthcare personnel are adequately trained to address the challenges and dangers patients face from shut down of hospitals and trauma-related injuries in armed conflict settings? |  | .759 |  |  |
| Rate the level of support provided by Ministry of health and non governmental l organizations to imply the strategies, protocols and proper equipment’s to provide health services in conflict-affected areas. |  | .835 |  |  |
| How effective do you find the current measures used in your setting to protect patients from violence-related incidents and ensure their well-being in case of lack of health services in conflict situations? |  | .769 |  |  |
| Extraction Method: Principal Component Analysis.   Rotation Method: Varimax with Kaiser Normalization. | | | | |
| a. Rotation converged in 5 iterations. | | | | |

**Table 3:** The table shows factor 1 components and their reliability testing (**N=33**)

| **Variables** | **Scale Mean if Item Deleted** | **Scale Variance if Item Deleted** | **Corrected Item-Total Correlation** | **Cronbach's Alpha if Item Deleted** |
| --- | --- | --- | --- | --- |
| This unit regularly reviews work processes to determine if changes are needed to improve patient safety. | 28.52 | 49.820 | .549 | .831 |
| My supervisor, manager, or clinical leader seriously considers staff suggestions for improving patient safety | 28.15 | 48.008 | .618 | .824 |
| My supervisor, manager, or clinical leader takes action to address patient safety concerns that are brought to their attention. | 27.94 | 49.121 | .761 | .814 |
| We are informed about errors that happen in this unit. | 28.33 | 49.042 | .782 | .812 |
| When errors happen in this unit, we discuss ways to prevent them from happening again. | 28.18 | 46.591 | .706 | .814 |
| In this unit, we are informed about changes that are made based on event reports. | 28.33 | 47.354 | .727 | .813 |
| When staff in this unit see someone with more authority doing something unsafe for patients, they speak up. | 28.27 | 51.080 | .578 | .828 |
| When staff in this unit speak up, those with more authority are open to their patient safety concerns. | 28.24 | 47.877 | .775 | .810 |
| Hospital management seems interested in patient safety only after an adverse event happens. | 28.52 | 67.320 | -.353 | .906 |
| How would you rate your unit/work area on patient safety | 29.15 | 51.070 | .564 | .829 |

**Table 4:** The table shows factor 2 components and their reliability testing (**N=33**)

| **Variables** | **Scale Mean if Item Deleted** | **Scale Variance if Item Deleted** | **Corrected Item-Total Correlation** | **Cronbach's Alpha if Item Deleted** |
| --- | --- | --- | --- | --- |
| In this unit, we have enough staff to handle the workload. | 10.48 | 8.133 | .623 | .678 |
| When a mistake reaches the patient and could have harmed the patient, but did not, how often is this reported? | 10.39 | 11.434 | .255 | .807 |
| To what extent you agree that healthcare personnel are adequately trained to address the challenges and dangers patients face from shut down of hospitals and trauma-related injuries in armed conflict settings? | 10.18 | 9.778 | .636 | .677 |
| Rate the level of support provided by Ministry of health and non-governmental l organizations to imply the strategies, protocols and proper equipment’s to provide health services in conflict-affected areas. | 10.61 | 9.746 | .646 | .674 |
| How effective do you find the current measures used in your setting to protect patients from violence-related incidents and ensure their well-being in case of lack of health services in conflict situations? | 10.45 | 10.443 | .541 | .710 |

**Table 5:** The table shows factor 3 components and their reliability testing (**N=33**)

| **Variables** | **Scale Mean if Item Deleted** | **Scale Variance if Item Deleted** | **Corrected Item-Total Correlation** | **Squared Multiple Correlation** | **Cronbach's Alpha if Item Deleted** |
| --- | --- | --- | --- | --- | --- |
| This unit lets the same patient safety problems keep happening. (negatively worded) | 3.06 | 1.621 | .468 | .219 |  |
| During shift changes, there is adequate time to exchange all key patient care information. | 3.27 | 1.642 | .468 | .219 |  |

**Table 6:** The table shows factor 4 components and their reliability testing (**N=33**)

| **variables** | **This unit relies too much on temporary, float, or PRN staff. (negatively worded)** | **In this unit, staff feel like their mistakes are held against them.** | **When an event is reported in this unit, it feels like the person is being written up, not the problem.** |
| --- | --- | --- | --- |
| This unit relies too much on temporary, float, or PRN staff. (negatively worded) | 1.000 | .226 | .442 |
| In this unit, staff feel like their mistakes are held against them. | .226 | 1.000 | .658 |
| When an event is reported in this unit, it feels like the person is being written up, not the problem. | .442 | .658 | 1.000 |
